# Supplementary material
Source: ML conference proceedings conference paper supplement (https://openreview.net/forum?id=9HSvvFH3ga)
Supplement: supplementary_material [file interventions_formula.pdf › interventions_formula.pdf]

$$\text{the}\{\text{Interventions}\} := \{ \mathcal{L}_2(P^*, P), \quad A^*(\ell, h) - A(\ell, h) \}_{\ell, h} \text{ for } \ell \in \mathcal{L}, h \in \mathcal{H}$$
