# Supplementary material
Source: ML conference proceedings conference paper supplement (https://openreview.net/forum?id=9HSvvFH3ga)

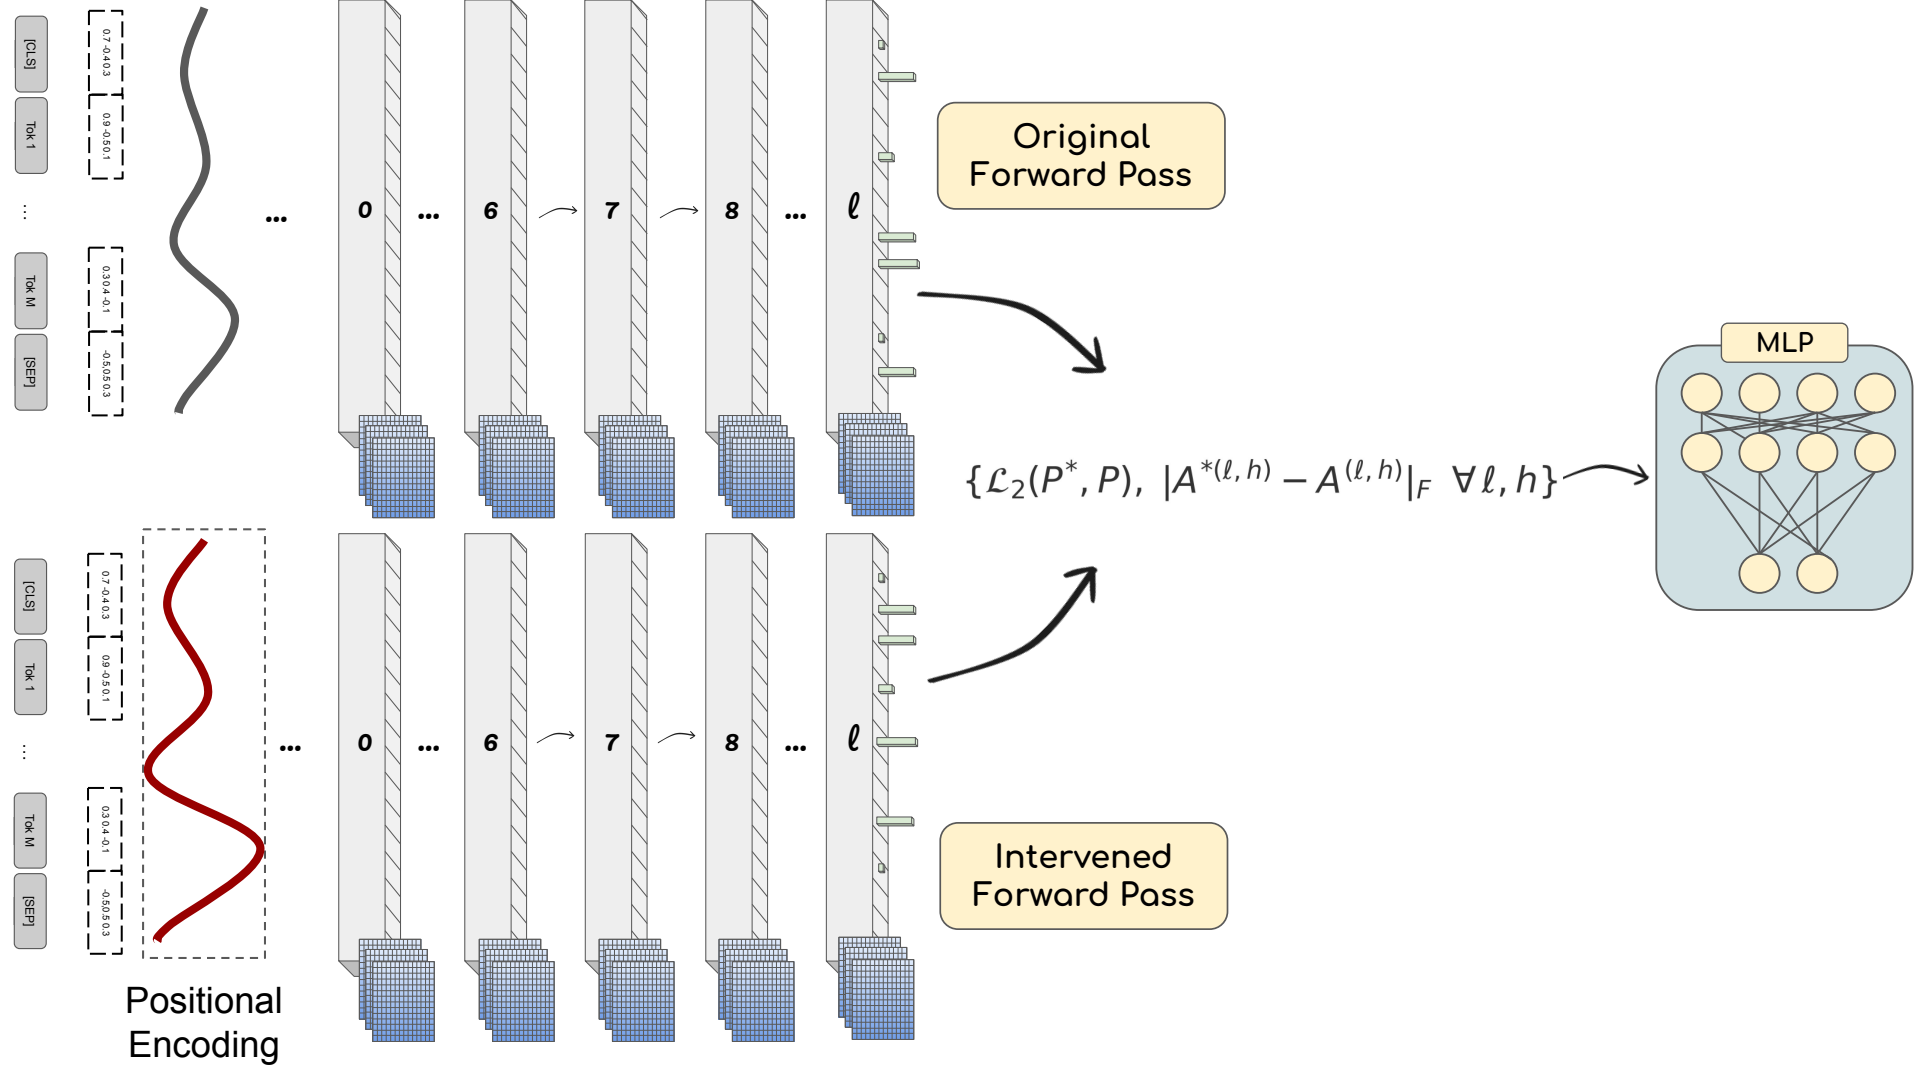

Supplement: supplementary_material [file technique.pdf › figures/technique.pdf]

**Cumulative FLOPs over Examples**

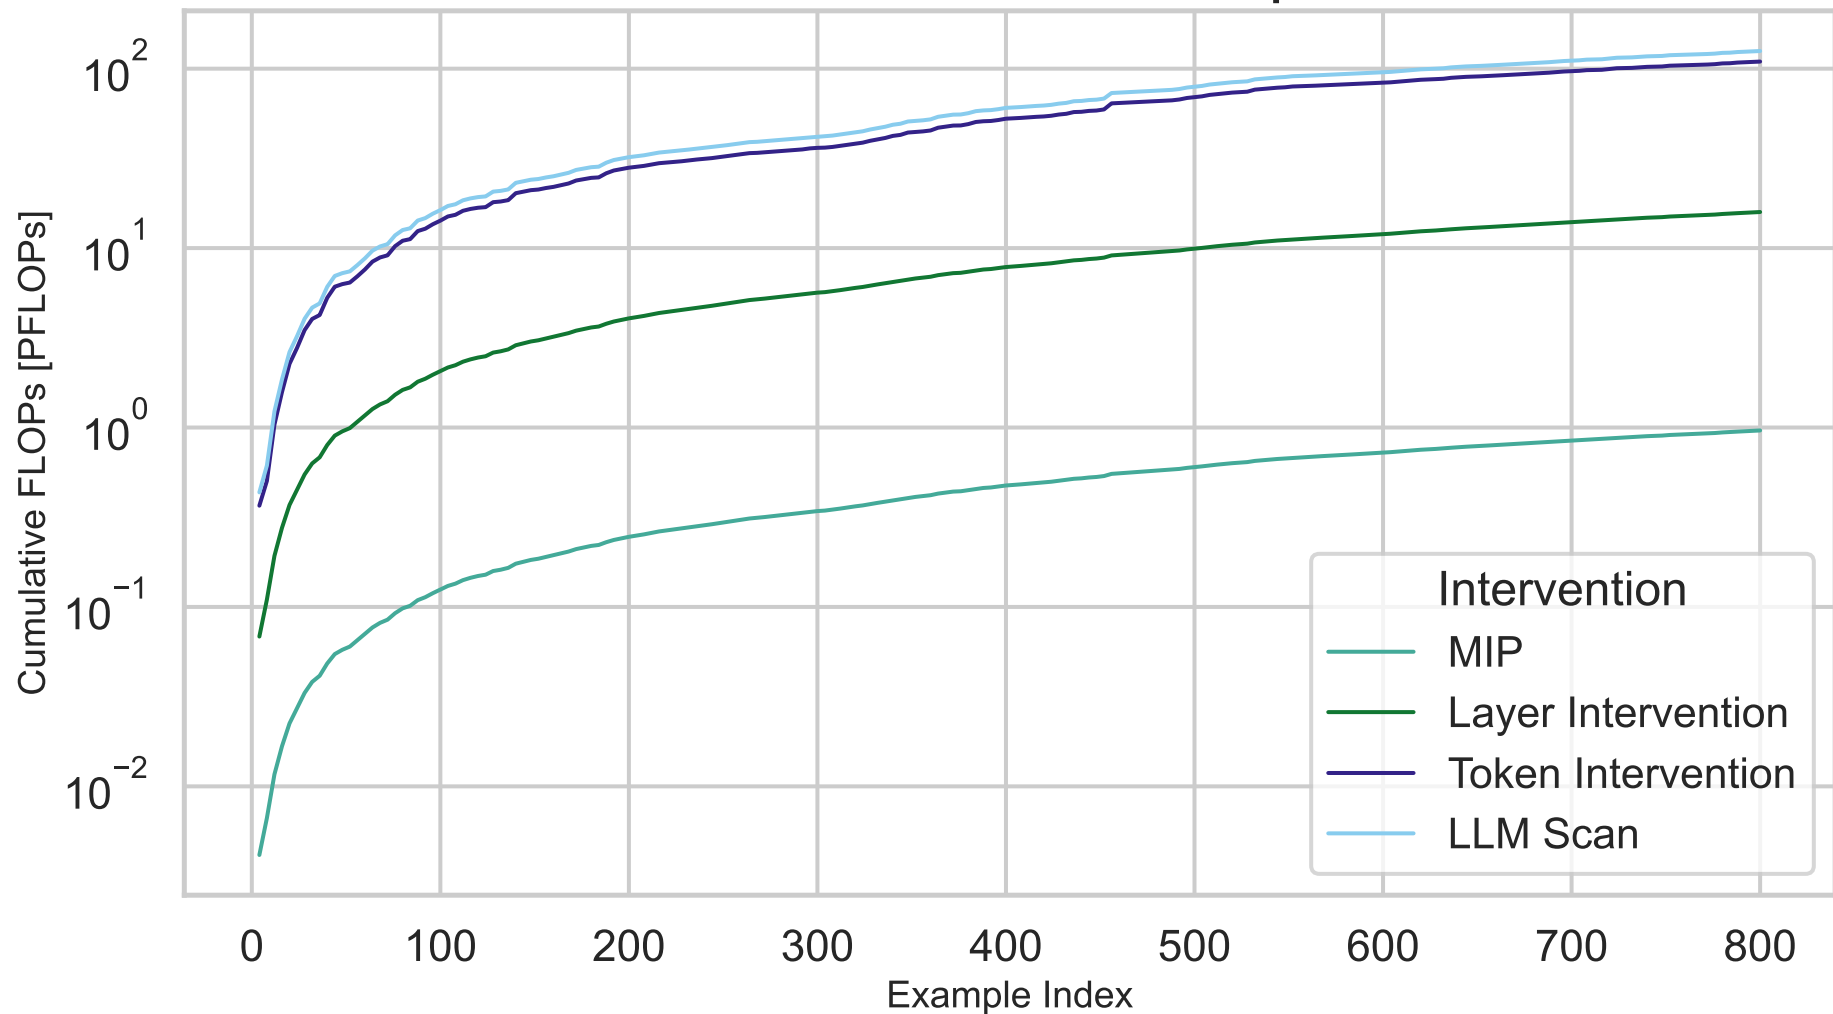

Supplement: supplementary_material [file cumulative_flops_comparison.pdf › results/flops/cumulative_flops_comparison.pdf]
